# Supplementary material for: Systematic review of the clinical manifestations of glucose-6-phosphate dehydrogenase deficiency in the Greater Mekong Subregion: implications for malaria elimination and beyond
Source: PubMed Central journal article supplement (PMC5656182; doi:10.1136/bmjgh-2017-000415), 2017-08-19
Supplement: bmjgh-2017-000415supp001.pdf [file bmjgh-2017-000415supp001.pdf]

**S1 File.** PRISMA flow diagram.

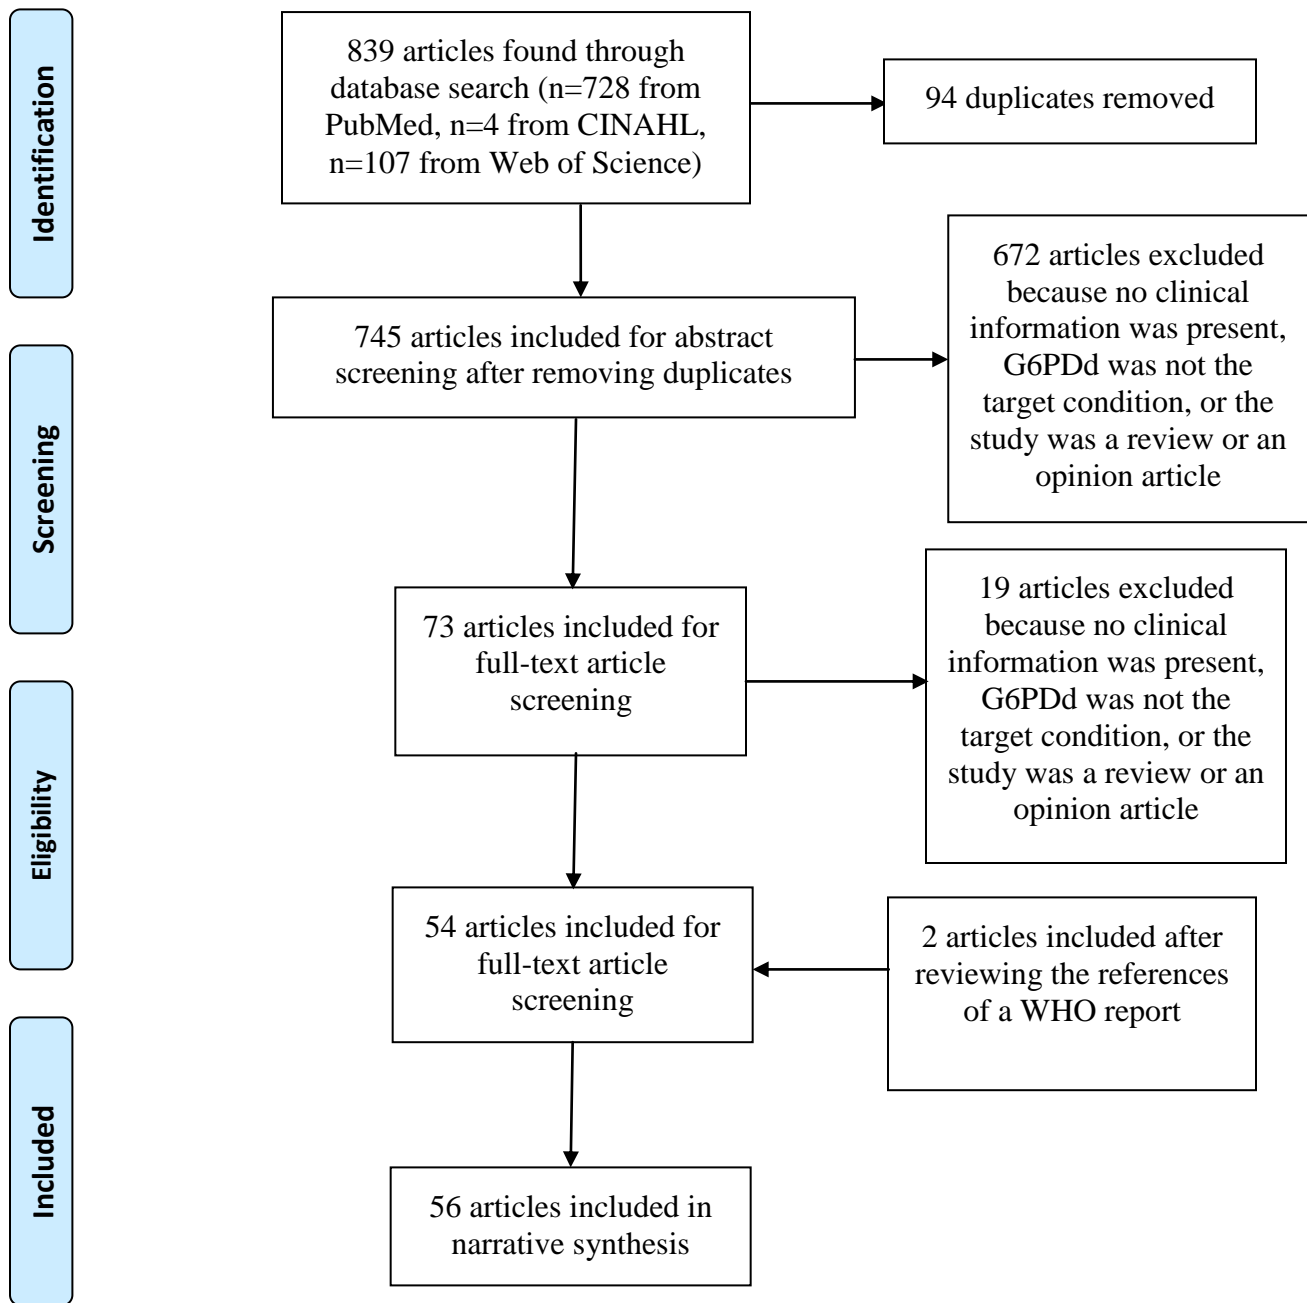

From: Moher D, Liberati A, Tetzlaff J, Altman DG, The PRISMA Group (2009). Preferred Reporting Items for Systematic Reviews and Meta-Analyses: The PRISMA Statement. PLoS Med 6(6): e1000097. doi:10.1371/journal.pmed1000097

For more information, visit [www.prisma-statement.org](http://www.prisma-statement.org).
