# Supplementary material for: Systematic review of the clinical manifestations of glucose-6-phosphate dehydrogenase deficiency in the Greater Mekong Subregion: implications for malaria elimination and beyond
Source: PubMed Central journal article supplement (PMC5656182; doi:10.1136/bmjgh-2017-000415), 2017-08-19
Supplement: bmjgh-2017-000415supp004.pdf [file bmjgh-2017-000415supp004.pdf]

**S1 Table. Summary of included studies.**

| No. | Reference              | Type of study                             | Country (City)                | Year | Population (Age, gender, if available)                                                                                                                                                                   | Population size | Diagnostic methods                | Exposures (Dosage, if available)                                                 | Clinical outcome                                                                                                                                 | Remarks                                                                                                                                                                                  |
|-----|------------------------|-------------------------------------------|-------------------------------|------|----------------------------------------------------------------------------------------------------------------------------------------------------------------------------------------------------------|-----------------|-----------------------------------|----------------------------------------------------------------------------------|--------------------------------------------------------------------------------------------------------------------------------------------------|------------------------------------------------------------------------------------------------------------------------------------------------------------------------------------------|
| 1   | Areekul 1996 [24]      | Case report                               | Thailand (Bangkok)            | 1996 | 13, 14, 29 years old G6PD deficient male patients with typhoid fever                                                                                                                                     | 3               | N/A                               | Typhoid fever                                                                    | Hemolysis, hemoglobinuria                                                                                                                        | This paper described the elevated serum transcobalamin II levels in three G6PD deficient patients with typhoid fever                                                                     |
| 2   | Arnolda 2015 [49]      | Retrospective cohort                      | Myanmar (Yangon and Mandalay) | 2015 | Neonates treated on new phototherapy machines over 13–20 months at two pediatric referral hospitals in Myanmar.                                                                                          | 590             | Methemoglobin reduction test      | N/A                                                                              | Acute bilirubin encephalopathy (ABE)                                                                                                             | G6PD deficiency was a risk factor for ABE (only in one hospital).                                                                                                                        |
| 3   | Bancone 2016 [57]      | Repeated cross-sectional and cohort study | Thai–Myanmar border           | 2016 | Male and female villagers older than six months                                                                                                                                                          | 819             | Fluorescent spot test             | Primaquine (single dose 0.25 mg base/kg)                                         | Dizziness, fractional hemoglobin fall among G6PD deficient villagers, itchiness                                                                  | Authors concluded that a single low dose of primaquine (0.25mg/kg) can be used safely without prior G6PD testing                                                                         |
| 4   | Na Bangchang 1994 [18] | Cohort study                              | Thailand (Bangkok)            | 1994 | 13 G6PD normal and 13 G6PD deficient Thai male vivax malaria patients                                                                                                                                    | 26              | N/A                               | Primaquine (daily dose of 15mg for 14 days)                                      | Hemolysis was observed in all G6PD deficient patients                                                                                            | G6PD status is a useful predictor for the risk of hemolysis after treatment with primaquine                                                                                              |
| 5   | Buchachart 2001[58]    | Prospective cohort study                  | Thailand (Bangkok)            | 2001 | Vivax malaria patients                                                                                                                                                                                   | 364             | Fluorescent spot test             | Primaquine (daily dose of 15mg for 14 days)                                      | Significantly decreased hematocrit level among G6PD deficient individuals                                                                        | Daily doses of 15 mg of primaquine for 14 days following a full course of chloroquine when prescribed to Thai G6PD patients where the Mahidol variant is predominant are relatively safe |
| 6   | Burgoine 2010 [19]     | Case report                               | Thai–Myanmar border           | 2010 | 35-year-old male vivax malaria patient                                                                                                                                                                   | 1               | Fluorescent spot test, genotyping | Primaquine (overdosing)                                                          | Intravascular hemolysis                                                                                                                          | In <i>P.vivax</i> endemic areas, patients should be tested for G6PD deficiency and sufficiently informed of the side effects of primaquine before administration                         |
| 7   | Butthep 2000 [50]      | Cross-sectional                           | Thailand (Bangkok)            | 2000 | 28 anemic patients (15 with iron deficiency anemia, and 13 with hemolytic anemia including 9 G6PD deficient and 4 G6PD deficient combined with HbE trait or alpha thalassemia trait); 25 normal patients | 53              | G6PD assay                        | N/A                                                                              | Increase in mean corpuscular reticulocyte volume in anemic G6PD deficient patients                                                               |                                                                                                                                                                                          |
| 8   | Chanda 2015 [69]       | Cohort study                              | Thailand (Bangkok)            | 2015 | 18–24-year-old female volunteers                                                                                                                                                                         | 36              | Genetic characterization          | Strenuous exercise                                                               | An increase in total microparticles (TTMPs) concentration was significantly higher in individuals with G6PD Viangchan as compared to G6PDnormal. | Individuals with G6PD Viangchan variant may participate in moderate-intensity exercise without higher oxidative stress compared to G6PD normal individuals                               |
| 9   | Charoenlarp 1972 [17]  | Cohort study                              | Thailand (Bangkok)            | 1972 | 18–26-year-old Thai males with G6PD deficiency                                                                                                                                                           | 7               | NADPH quantification              | Primaquine (single dose of 45mg)                                                 | Hemolysis                                                                                                                                        |                                                                                                                                                                                          |
| 10  | Charoenlarp 1973 [20]  | Cohort study                              | Thailand (Bangkok)            | 1973 | Healthy Thai male with G6PD deficiency                                                                                                                                                                   | 3               | NADPH quantification              | Primaquine (two 14-day daily dose of 15mg )                                      | Hemolysis                                                                                                                                        | The 15 mg dose of primaquine in Thais caused hemolysis as rigorously as that induced by 30 mg in the African type                                                                        |
| 11  | Chin 1973 [59]         | Non-randomized controlled study           | Thailand (Trad)               | 1973 | Adult males 15 years of age or older with a positive blood smear for falciparum malaria                                                                                                                  | 88              | Fluorescent spot test             | Sulfalene (1g)-trimethoprim (0.5g) , Sulphormethoxine (1g)-pyrimethamine (0.05g) | No significant toxic side reactions                                                                                                              |                                                                                                                                                                                          |

|    |                               |                             |                                            |      |                                                                                                                                                                                                                                                                                                                                    |      |                                                                                  |                                                               |                                                                                                  |                                                                                                                                                                                                                                      |
|----|-------------------------------|-----------------------------|--------------------------------------------|------|------------------------------------------------------------------------------------------------------------------------------------------------------------------------------------------------------------------------------------------------------------------------------------------------------------------------------------|------|----------------------------------------------------------------------------------|---------------------------------------------------------------|--------------------------------------------------------------------------------------------------|--------------------------------------------------------------------------------------------------------------------------------------------------------------------------------------------------------------------------------------|
| 12 | Chongsuphajaisiddhi 1987 [60] | Case series                 | Thailand (Bangkok)                         | 1987 | 5–12 years old children with acute, uncomplicated falciparum malaria                                                                                                                                                                                                                                                               | 84   | N/A                                                                              | Mefloquine (a single dose of 18–29mg base per kg body weight) | No significant toxic side reactions except vomiting, diarrhea, and mild abdominal pain           | Mefloquine was effective in treating falciparum malaria                                                                                                                                                                              |
| 13 | Chuansumrit 2012 [25]         | Case series                 | Thailand (Bangkok)                         | 2012 | Hematologic–oncologic pediatric patients with dengue infection                                                                                                                                                                                                                                                                     | 907  | N/A                                                                              | Dengue infection                                              | Anemia from acute hemolysis and hemoglobinuria was prominent among patients with G6PD deficiency |                                                                                                                                                                                                                                      |
| 14 | Devakul 1969 [26]             | Case series                 | Thailand (Bangkok)                         | 1969 | Thai male infected with malaria who had been transferred from a mental hospital                                                                                                                                                                                                                                                    | 10   | N/A                                                                              | Falciparum malaria                                            | Hemolysis                                                                                        | Considerable total hemoglobin concentration fall in G6PD deficient patients                                                                                                                                                          |
| 15 | Everett 1977 [21]             | Cohort study                | Cambodia                                   | 1977 | Khmer Air Force male troops                                                                                                                                                                                                                                                                                                        | 106  | N/A                                                                              | Primaquine (daily dose of 15mg for 14 days)                   | Primaquine induced significant, but not dangerous hemolysis in G6PD deficient individuals        | Primaquine induced a significant but safe level of hemolysis in subjects with G6PD Mahidol                                                                                                                                           |
| 16 | Flatz 1963 [51]               | Cross-sectional             | Thailand (Nakorn Rajasima, Surin, Bangkok) | 1963 | 122 married women over the age of 36 years from North-east Thailand (Nakorn Rajasima and Surin), 1327 cord blood samples from newborns in Bangkok, 11 patients thought to suffer from cerebral palsy due to bilirubin encephalopathy (8 males, 3 females) and 22 children with similar age and sex distribution as a control group | 1482 | Methemoglobin reduction test                                                     | Oxidative drugs/chemicals                                     | G6PD deficient group had more severe, unexplained jaundice                                       | G6PD deficiency is a risk factor for cerebral palsy due to bilirubin encephalopathy. Neonatal hyperbilirubinemia with bilirubin encephalopathy seemed to be the main negative balancing factor for the G6PD polymorphism in Thailand |
| 17 | Flatz 1964 [38]               | Cross-sectional             | Thailand (Chiang Mai)                      | 1964 | Newborn infants                                                                                                                                                                                                                                                                                                                    | 236  | Dye reduction test, methemoglobin reduction test                                 | N/A                                                           | Jaundice                                                                                         | The risk of G6PD deficient newborn infants developing severe jaundice in the absence of drug administration seems to be low under the conditions in Northern Thailand                                                                |
| 18 | Harinasuta 1983 [61]          | Randomized controlled trial | Thailand (Bangkok)                         | 1983 | Male patients suffering from acute, uncomplicated, falciparum malaria                                                                                                                                                                                                                                                              | 147  | Quantitative test                                                                | Single dose of either 500, 750, or 1000mg of mefloquine       | Nausea, vomiting, diarrhea                                                                       | Mefloquine was well tolerated, no evidence of hemolysis                                                                                                                                                                              |
| 19 | Nguyen 2009 [52]              | Cross-sectional             | Vietnam (Ho Chi Minh City, Binh Phuoc)     | 2009 | General population and hemoglobinuria patients                                                                                                                                                                                                                                                                                     | 606  | Methylene blue reduction test, G-6-PDH kit, micromethemoglobin in reduction test | Active malaria, ingestion of oxidant drugs such as primaquine | Hemoglobinuria                                                                                   | G6PD deficiency is strongly associated with hemoglobinuria                                                                                                                                                                           |
| 20 | Kahn 1978 [70]                | Case report                 | France (patient was from Laos)             | 1978 | 28 years old male patient admitted to the hospital with symptomatology of paroxysmal nocturnal hemoglobinuria (PNH).                                                                                                                                                                                                               | 1    | G6PD assay                                                                       | N/A                                                           | Hemoglobinuria                                                                                   | A new G6PD variant called G6PD Vientiane was discovered.                                                                                                                                                                             |
| 21 | Karwacki 1989 [22]            | Case report                 | Thailand (Chanthaburi)                     | 1989 | 28 years old Royal Thai Marine Militia Soldier                                                                                                                                                                                                                                                                                     | 1    | Methemoglobin reduction test                                                     | Primaquine (15mg daily for 3 days)                            | Vomiting, hemolysis, acute renal failure                                                         | The unusual nature of the case reported here could mean either underreporting of adverse events due to G6PD deficiency or the rarity of severe G6PD induced hemolysis in Thailand                                                    |

|                         |                                           |                                                                       |      |                                                                                                                                                                    |      |                                                       |                                                                                                                                                                                 |                                                                                                                                                                                                                      |                                                                                                                                                                                                                                                                                                   |
|-------------------------|-------------------------------------------|-----------------------------------------------------------------------|------|--------------------------------------------------------------------------------------------------------------------------------------------------------------------|------|-------------------------------------------------------|---------------------------------------------------------------------------------------------------------------------------------------------------------------------------------|----------------------------------------------------------------------------------------------------------------------------------------------------------------------------------------------------------------------|---------------------------------------------------------------------------------------------------------------------------------------------------------------------------------------------------------------------------------------------------------------------------------------------------|
| 22 Kheng 2015 [23]      | Clinical trial                            | Cambodia (Pailin, Anlong Venh, Oddar Meanchey, Veal Veng, and Pursat) | 2015 | Acute vivax malaria patients                                                                                                                                       | 75   | Quantitative G6PD assay (Trinity Biotech), genotyping | Primaquine (0.75mg/kg for 8 weeks)                                                                                                                                              | Significant but transient fall in hemoglobin level, and one patient received a blood transfusion                                                                                                                     | Weekly primaquine in G6PDd patients mandates medical supervision and pre-treatment screening for G6PD status. Severe G6PDd is prevalent mostly in western Cambodia where artemisinin resistance is also present. Therefore primaquine safety and G6PD point of care evaluation studies are needed |
| 23 Khim 2013 [42]       | Cross-sectional                           | Cambodia (mainly western Cambodia)                                    | 2013 | Malaria infected patients from 19 health centres in Cambodia                                                                                                       | 2408 | G6PD quantitative assay (Trinity Biotech)             | Malaria infection                                                                                                                                                               | Anemia is more frequent in G6PD deficient patients                                                                                                                                                                   |                                                                                                                                                                                                                                                                                                   |
| 24 Kitayaporn 1991 [37] | Cross-sectional                           | Thailand (Chanthaburi)                                                | 1991 | Patients aged 16–60 years                                                                                                                                          | 395  | Fluorescent spot test                                 | Fava bean consumption                                                                                                                                                           | No evidence of hemolysis resulting from G6PD deficiency                                                                                                                                                              |                                                                                                                                                                                                                                                                                                   |
| 25 Kotepui 2016 [43]    | Cross-sectional                           | Thailand (Tak)                                                        | 2016 | Malaria patients                                                                                                                                                   | 245  | Fluorescent spot test                                 | Malaria infection                                                                                                                                                               | G6PD deficient patients have higher monocyte counts.                                                                                                                                                                 | G6PD deficient RBCs have no protection against <i>P. falciparum</i> infection.                                                                                                                                                                                                                    |
| 26 Krudsood 2006 [62]   | Randomized, open-label, prospective study | Thailand (Bangkok)                                                    | 2006 | 16–51 years old vivax malaria patients                                                                                                                             | 141  | Screening test                                        | Primaquine 30mg daily for 7 days, elubaquine 25mg once daily for 7 days                                                                                                         | Mean hematocrit was significantly reduced in patients treated with primaquine compared with elubaquine                                                                                                               | Elubaquine might have less oxidative toxicity compared to primaquine                                                                                                                                                                                                                              |
| 27 Lampe 1975 [44]      | Cross-sectional                           | Thailand (Bangkok)                                                    | 1975 | 3 groups of patients seen at Children's Hospital, Bangkok (typhoid fever, outpatients who were free of bacterial disease, patients with serious bacterial disease) | 231  | Methemoglobin-elution test                            | Typhoid fever, bacterial diseases such as meningitis                                                                                                                            | Increased susceptibility to infection                                                                                                                                                                                | G6PD deficiency is associated with typhoid fever and susceptibility to certain infectious diseases                                                                                                                                                                                                |
| 28 Laosombat 2006 [36]  | Retrospective descriptive                 | Thailand (Songkla)                                                    | 2006 | G6PD deficient children (210 boys, 15 girls)                                                                                                                       | 225  | G6PD assay                                            | Ingestion of fava beans, drugs, infections                                                                                                                                      | Favism, anemia, hemoglobinuria, jaundice                                                                                                                                                                             | Favism was found in 3.6% of G6PDd Thai children                                                                                                                                                                                                                                                   |
| 29 Laosombat 2005 [32]  | Retrospective descriptive                 | Thailand (Songkla)                                                    | 2005 | G6PD deficient children (210 boys, 16 girls)                                                                                                                       | 225  | G6PD Assay                                            | Ingestion of fava beans, drugs, infections                                                                                                                                      | Neonatal jaundice, acute hemolysis, and drug-induced acute hemolysis were observed in these patients.                                                                                                                | A new variant of G6PD gene was describe: g6PD Songklanagarind                                                                                                                                                                                                                                     |
| 30 Lederer 1988 [45]    | Cross-sectional                           | Thailand                                                              | 1988 | Adult male malaria patients (either falciparum or vivax)                                                                                                           | 192  | Fluorescent spot test                                 | Malaria infection                                                                                                                                                               | G6PD deficient patients had significantly less gastrointestinal disturbances, higher serum glutamic oxalacetic transaminase, and significantly lower blood urea nitrogen compared with the G6PD normal malaria cases | G6PD deficiency has no significant influence on the clinical presentation of malaria.                                                                                                                                                                                                             |
| 31 Myat 1994 [63]       | Clinical trial                            | Myanmar (Lashio, Mandalay)                                            | 1994 | Malaria patients                                                                                                                                                   | 63   | Methemoglobin reduction test                          | 600 mg quinine 3 times per day for 7 days followed by 45mg single dose primaquine for gametocytes (falciparum malaria) and 45mg weekly primaquine for 8 weeks for vivax malaria | No hemolysis was reported and no marked change in methemoglobin concentration was observed                                                                                                                           | Toxicity of primaquine might be dose related                                                                                                                                                                                                                                                      |
| 32 Noedl 2002 [46]      | Cross-sectional                           | Thailand (Bangkok)                                                    | 2002 | Microscopically confirmed falciparum malaria patients of both genders                                                                                              | 119  | Fluorescent spot test                                 | Malaria infection                                                                                                                                                               | G6PD deficient patients have shorter median fever clearance time compared to G6PD normal individuals                                                                                                                 |                                                                                                                                                                                                                                                                                                   |

|    |                        |                             |                                  |      |                                                                                               |      |                                   |                                                                                                 |                                                                                                                                                                              |                                                                                                                                                                      |
|----|------------------------|-----------------------------|----------------------------------|------|-----------------------------------------------------------------------------------------------|------|-----------------------------------|-------------------------------------------------------------------------------------------------|------------------------------------------------------------------------------------------------------------------------------------------------------------------------------|----------------------------------------------------------------------------------------------------------------------------------------------------------------------|
| 33 | Oo 1995 [47]           | Cross-sectional             | Myanmar (Yangon)                 | 1995 | Bamar male aged 19–45 with severe falciparum malaria                                          | 383  | Methemoglobin reduction test      | Malaria infection                                                                               | The mean parasitemia level in patients with severe G6PDd variant was significantly lower compared to normal and mild deficiency variants                                     | The double genetic defect of thalassemia trait and severe G6PD deficiency appeared to confer some degree of protection against malaria.                              |
| 34 | Panich 1973 [33]       | Case report                 | Thailand                         | 1973 | Hospital patients                                                                             | 4    | Methemoglobin reduction test      | Drug, and/or infection                                                                          | Acute hemolysis, hemoglobinuria                                                                                                                                              | G6PD Union (Thai) resulted in acute hemolysis                                                                                                                        |
| 35 | Panich 1970 [48]       | Case report                 | Thailand                         | 1970 | Hospital patients                                                                             | 8    | Rapid screening dye test.         | Infections                                                                                      | Anemia, jaundice, hemoglobinuria                                                                                                                                             | Hereditary elliptocytosis is associated with G6PD deficiency                                                                                                         |
| 36 | Phornphutkul 1969 [39] | Case series                 | Thailand                         | 1969 | Newborn infants                                                                               | 1785 | Methemoglobin reduction test      | N/A                                                                                             | Neonatal jaundice                                                                                                                                                            | G6PD deficiency might be an important cause of severe early neonatal jaundice                                                                                        |
| 37 | Pornprasert 2013 [68]  | Case series                 | Thailand (Chiang Mai)            | 2013 | People living with HIV                                                                        | 109  | Fluorescent spot test, genotyping | Highly active antiretroviral therapy                                                            | Non reported                                                                                                                                                                 | HAART did not cause hemolytic anemia and hyperbilirubinemia in people living with HIV                                                                                |
| 38 | Pornprasert 2013 [53]  | Cross-sectional             | Thailand (Chiang Mai)            | 2013 | Thalassemia patients                                                                          | 410  | Fluorescent spot test             | N/A                                                                                             | Non reported                                                                                                                                                                 | In the absence of a high oxidative stress condition, G6PD deficiency did not enhance red blood cell pathology or induce more anemic severity in thalassemia patients |
| 39 | Pornprasert 2016 [71]  | Cross-sectional             | Thailand (Chiang Mai)            | 2016 | Volunteer students of one school in a fluoride endemic area, and two schools in control areas | 481  | Fluorescent spot test             | Fluoride exposure                                                                               | Students in fluoride endemic area with hematological disorders (iron deficiency, thalassemia, G6PDd) had the lowest levels of Hb, MCH, MCHC, and the highest platelet counts | Fluoride might exacerbate the effect of G6PD deficiency .                                                                                                            |
| 40 | Poshyachinda 1978 [34] | Controlled trial            | Thailand (Bangkok)               | 1978 | G6PD normal and G6PD deficient volunteers                                                     | 34   | Methemoglobin reduction test      | 4, 4' Diformyl diaminodiphenylsulfone (DFD) (single dose of either 400, 800, 1200, and 1600 mg) | Hemolysis                                                                                                                                                                    | G6PDd individuals are susceptible to DFD-induced hemolysis.                                                                                                          |
| 41 | Prachukthum 2009 [54]  | Case-control                | Thailand (Bangkok)               | 2009 | Hyperbilirubinemic neonates and normal neonates                                               | 177  | G6PD assay                        | Blood group incompatibility, and variants of gene <i>UGT1A1</i> at nt 211                       | Hyperbilirubinemia                                                                                                                                                           | G6PD deficiency is associated with hyperbilirubinemia                                                                                                                |
| 42 | Sanpavat 2005 [72]     | Retrospective descriptive   | Thailand (Bangkok)               | 2005 | Neonates who underwent exchange transfusion                                                   | 165  | N/A                               | Blood group incompatibility                                                                     | Hyperbilirubinemia                                                                                                                                                           | G6PD deficiency caused hyperbilirubinemia.                                                                                                                           |
| 43 | Shanks 1992 [64]       | Randomized controlled trial | Thailand (Thai-Cambodian border) | 1992 | Royal Thai Marine Militia on guard duty along the Thai-Cambodian border                       | 438  | N/A                               | Doxycycline (100mg/day)                                                                         | No clinical outcome reported for G6PD deficient individuals                                                                                                                  | Authors concluded that doxycycline is an effective chemoprophylactic drug for malaria                                                                                |
| 44 | Sicard 1978 [35]       | Case report                 | Lao PDR                          | 1978 | Soldiers                                                                                      | 50   | Electrophoresis                   | Chloroquine (single dose of 600mg)                                                              | Severe hemolytic anemia, acute renal failure, hemoglobinuria                                                                                                                 |                                                                                                                                                                      |
| 45 | Silachamroon 2003 [65] | Randomized controlled trial | Thailand (Bangkok)               | 2003 | Vivax malaria patients                                                                        | 801  | Screening test                    | Primaquine (0.6 mg/kg for 14)                                                                   | Decreased hematocrit level                                                                                                                                                   | In Thailand where the prevalent variants of G6PD deficiency are mild, G6PDd patients will be unable to tolerate high dose primaquine                                 |
| 46 | Tachavanich 2009 [55]  | Cross-sectional             | Thailand                         | 2009 | Homozygous hemoglobin E individuals                                                           | 76   | N/A                               | N/A                                                                                             | Iron deficiency anemia                                                                                                                                                       | G6PD deficiency had no additional adverse effect on hematological parameters of homozygous hemoglobin E individuals                                                  |
| 47 | Talalak 1969 [41]      | Case report                 | Thailand                         | 1969 | Thai boy                                                                                      | 1    | G6PD assay                        | N/A                                                                                             | Congenital nonspherocytic hemolytic anemia, jaundice                                                                                                                         | This new variant found in the Thai boy was named G6PD Bangkok                                                                                                        |

|    |                          |                               |                                 |      |                                                                                     |      |                                                        |                                         |                                                                                                                                |                                                                                                                                      |
|----|--------------------------|-------------------------------|---------------------------------|------|-------------------------------------------------------------------------------------|------|--------------------------------------------------------|-----------------------------------------|--------------------------------------------------------------------------------------------------------------------------------|--------------------------------------------------------------------------------------------------------------------------------------|
| 48 | Tanphaichitr 2002 [27]   | Case series                   | Thailand (Bangkok)              | 2002 | Males aged 1–13 years diagnosed with dengue haemorrhagic fever (DHF)                | 89   | G6PD assay                                             | Dengue hemorrhagic fever                | Gastrointestinal bleeding, hemolysis, shock, renal and liver failure                                                           | Patients with G6PDd suffer from DHF more than patients with normal G6PD activity                                                     |
| 49 | Tanphaichitr 2011 [28]   | Case report                   | Thailand (Bangkok)              | 2011 | Two families                                                                        | 7    | G6PD assay                                             | Dengue hemorrhagic fever                | Neonatal jaundice, acute hemolysis, chronic hemolysis.                                                                         | A novel G6PD variant, G6PD Bangkok Noi was described                                                                                 |
| 50 | Tanphaichitr 1995 [40]   | Cross-sectional               | Thailand (Bangkok)              | 1995 | Newborn male infants                                                                | 505  | G6PD assay                                             | Infections, blood group incompatibility | Neonatal jaundice                                                                                                              | G6PDd male infants are more susceptible to develop neonatal jaundice compared to G6PD normal male infants                            |
| 51 | Tanphaichitr 1982 [29]   | Case series                   | Thailand (Bangkok)              | 1982 | Children with typhoid fever                                                         | 79   | G6PD quantitative assay, methemoglobin reduction test  | Typhoid fever                           | Acute, intravascular hemolysis among G6PD deficient patients, and transient, acquired G6PD deficiency among normal individuals | Typhoid fever can cause transient, acquired low G6PD level in G6PD normal subjects due to bone marrow suppression                    |
| 52 | Thisyakorn 1987 [31]     | Case series                   | Thailand (Bangkok)              | 1987 | Children with enteric fever.                                                        | 192  | Methemoglobin reduction test                           | Typhoid fever                           | Acute hemolytic anemia.                                                                                                        | G6PDd children treated with trimethoprim-sulfamethoxazole might be at risk of hemolysis                                              |
| 53 | Tran 1996 [56]           | Prospective descriptive study | (Vietnam) Ho Chi Minh City      | 1996 | Patients with blackwater fever                                                      | 50   | Methemoglobin reduction test                           | Quinine ingestion, malaria infection.   | Blackwater fever (Hemoglobinuria) is associated with G6PD deficiency                                                           |                                                                                                                                      |
| 54 | Wanachiwanawin 1990 [30] | Case report (Retrospective)   | Thailand (Bangkok)              | 1990 | G6PD deficient patients with viral hepatitis                                        | 9    | Rapid dye reduction test, methemoglobin reduction test | Viral hepatitis.                        | Acute hemolysis, severe hyperbilirubinemia, renal failure.                                                                     |                                                                                                                                      |
| 55 | Song 2010 [66]           | Case series                   | Cambodia (Kampong Speu, Kampot) | 2010 | All villagers in the targeted villages                                              | 6040 | G-6-PDH kit (Trinity Biotech)                          | Primaquine (9mg for adults)             | No severe adverse events reported                                                                                              | Mass drug administration of artemisinin-piperaquine and low doses of primaquine can be an effective strategy for eliminating malaria |
| 56 | Takeuchi 2010 [67]       | Randomized controlled trial   | Thailand (Ratchaburi)           | 2010 | Patients 3 years and above with microscopically-confirmed <i>P. vivax</i> infection | 216  | Genotyping                                             | Primaquine (5mg for 14 days)            | None reported                                                                                                                  | Directly-observed therapy (DOT) for primaquine helped to improve adherence                                                           |
